# Supplementary material
Source: PubMed Central journal article supplement (PMC6150646)
Supplement: bm7b01765_si_001.pdf [file bm7b01765_si_001.pdf]

## Supporting information

# Cyclodextrin-functionalized fiber yarns spun from deep eutectic cellulose solutions for non-specific hormone capture in aqueous matrices

*Hannes Orelma<sup>a\*</sup>, Tommi Virtanen<sup>a</sup>, Steven Spoljaric<sup>b</sup>, Jani Lehmonen<sup>a</sup>, Jukka Seppälä<sup>b</sup>, Orlando Rojas<sup>c</sup>, Ali Harlin<sup>a</sup>*

<sup>a</sup>VTT Technical Research Centre of Finland Ltd, Biologinkuja 7, FI-02044 Espoo, Finland

<sup>b</sup>Aalto University, Department of Chemical and Metallurgical Engineering, Kemistintie 1, FI-02150, Espoo, Finland

<sup>c</sup>Aalto University, Departments of Bioproducts and Biosystems and Applied Physics, Vuorimiehentie 1, FI-02150, Espoo, Finland.

Contents

Figure S1. SEM images of fibre yarn before a) and after b) modification with chitosan adsorption. C) fibre yarn after cyclodextrin conjugation via chitosan adsorption by using EDC/NHS chemistry. ....3

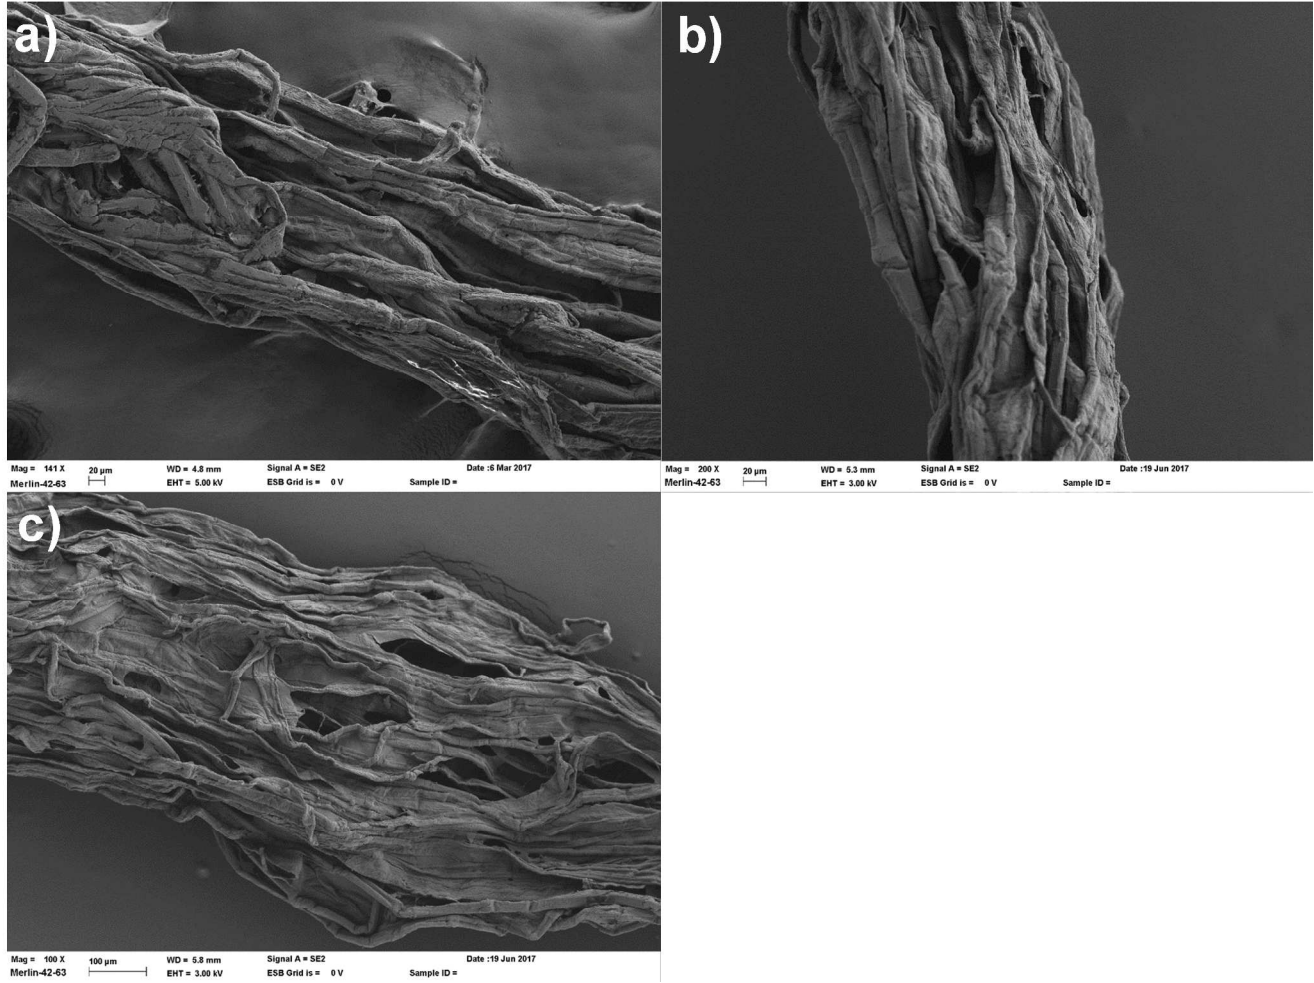

Figure S1. SEM images of fibre yarn before a) and after b) modification with chitosan adsorption. c) fibre yarn after cyclodextrin conjugation via chitosan adsorption by using EDC/NHS chemistry.
